# Supplementary material for: Self-assembly of copper(ii) complexes with ladder, bi-rack, rack–ladder–rack and layer structures by the directional-bonding approach using a T-shaped ligand
Source: Royal Society of Chemistry journal article supplement (doi:10.1039/b501782c), 2005-01-01
Supplement: b501782c.pdf [file b501782c.pdf]

## Supporting information

Self-assembly of copper complexes with ladder, bi-rack, rack-ladder-rack and layer structures by the directional-bonding approach using a T-shaped ligand

Ming-Sheng Wang, Guo-Cong Guo,\* Ming-Lai Fu, Ling Xu, Li-Zhen Cai, Jin-Shun Huang

*State Key Laboratory of Structural Chemistry, Fujian Institute of Research on the Structure of Matter, Chinese Academy of Sciences, Fuzhou, Fujian 350002, P. R. China*

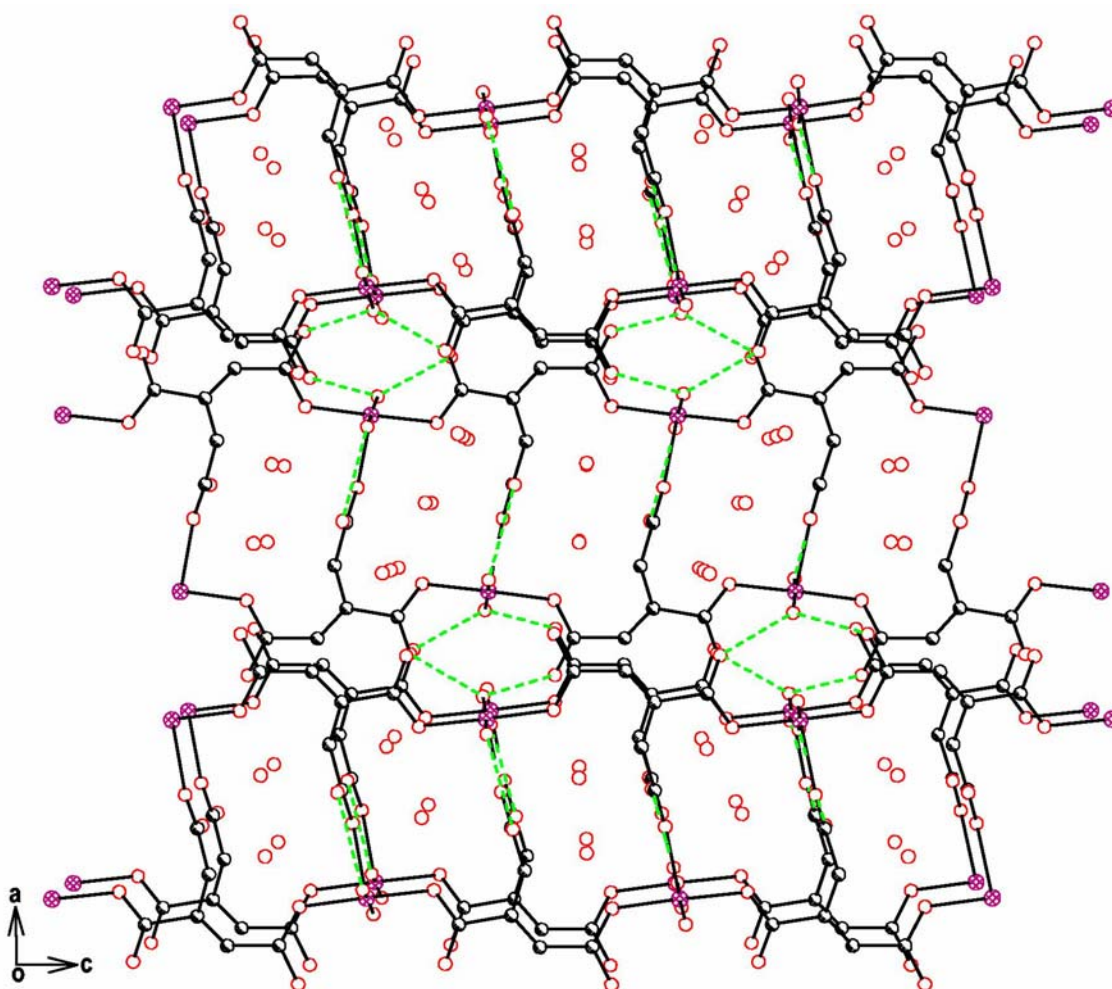

---

\* To whom correspondence should be addressed. E-mail: gcguo@ms.fjirsm.ac.cn.

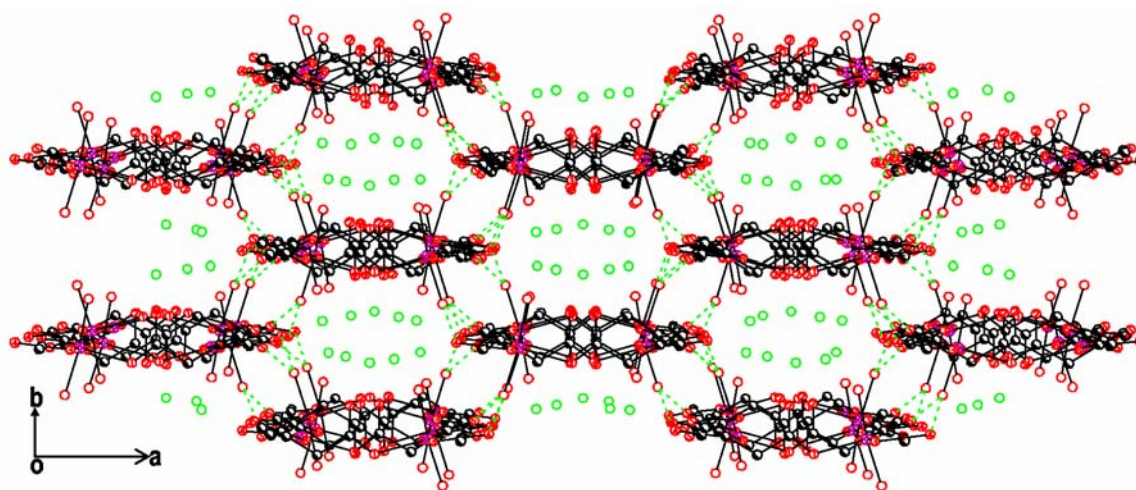

**Fig. S1** 3D packing diagram of **1** along the *b* (Top) or *c* (Bottom) direction with the dash lines showing the hydrogen bonds among the ladder-like chains.

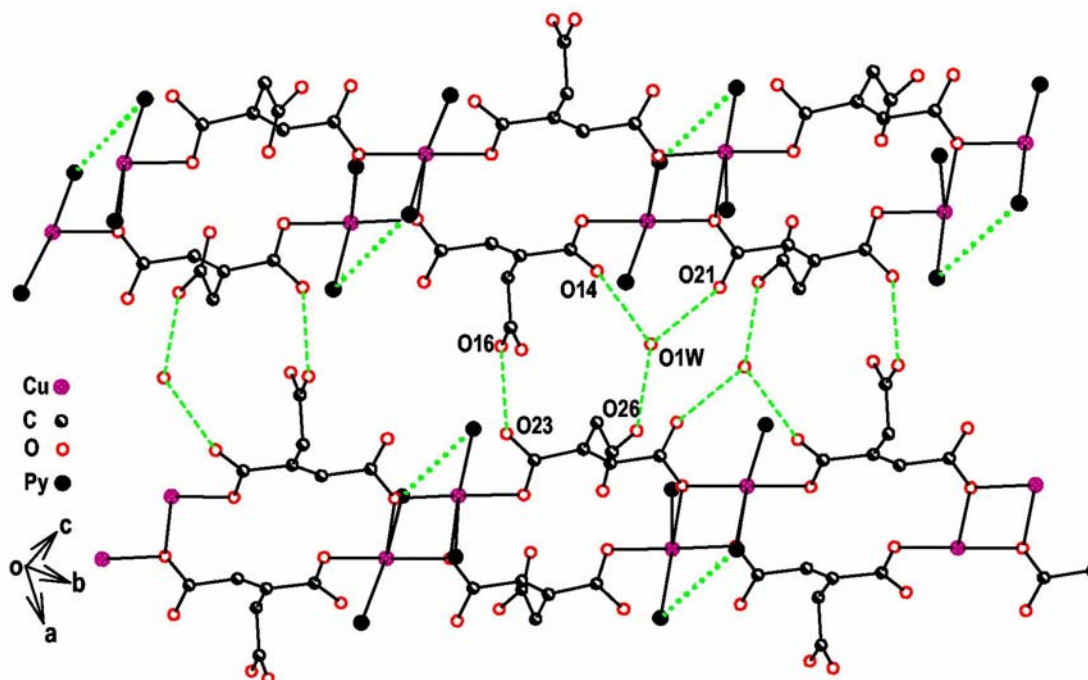

**Fig. S2** 2D layer of **3** lying in the  $[1\ 1\ 0]$  &  $[0\ 0\ 1]$  plane with the dotted lines showing the  $\pi$ - $\pi$  stacking interactions between two py ligands that contain N41 and N51, respectively, and the dash-lines showing the hydrogen bonding interactions among the chains and lattice water molecules.

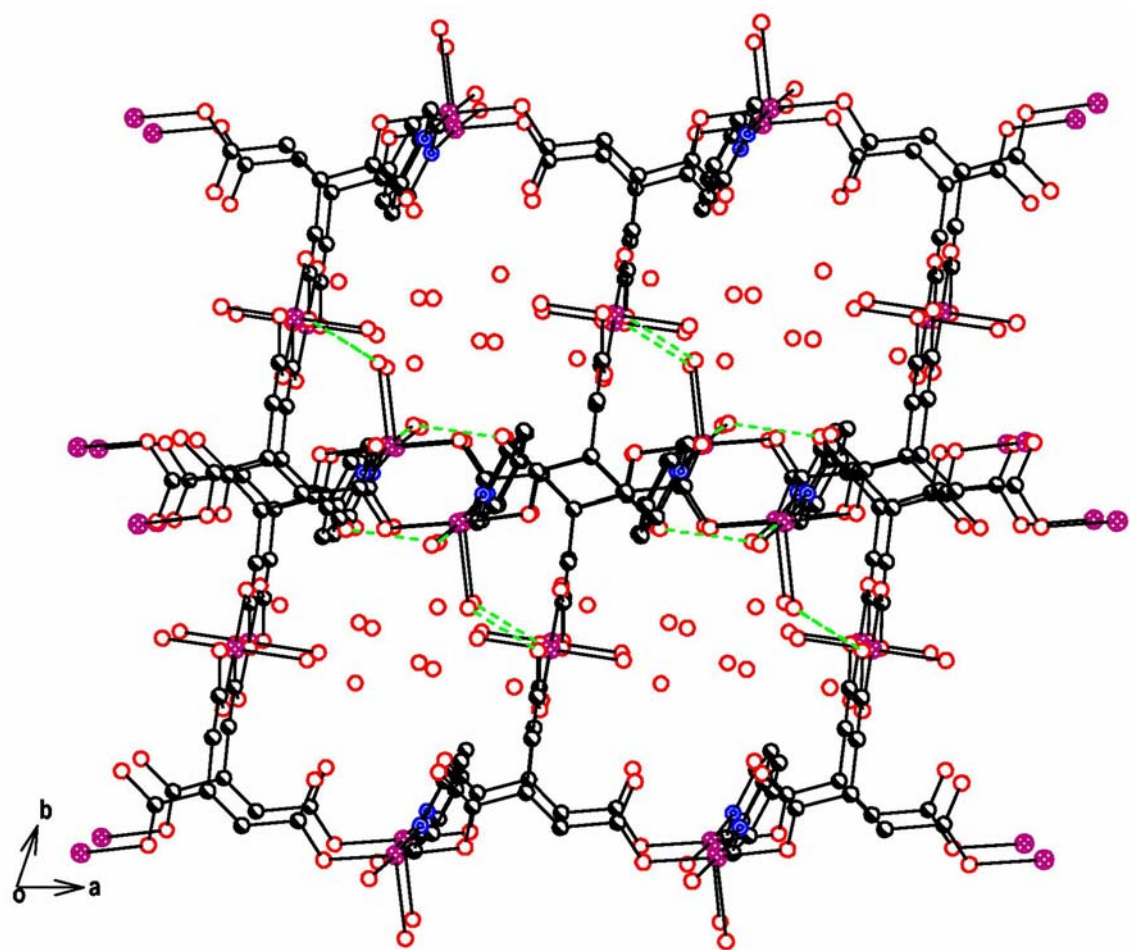

**Fig. S3** 3D packing diagram of **4** along the *c* direction with the dash-lines showing the hydrogen bonding interactions among the chains.

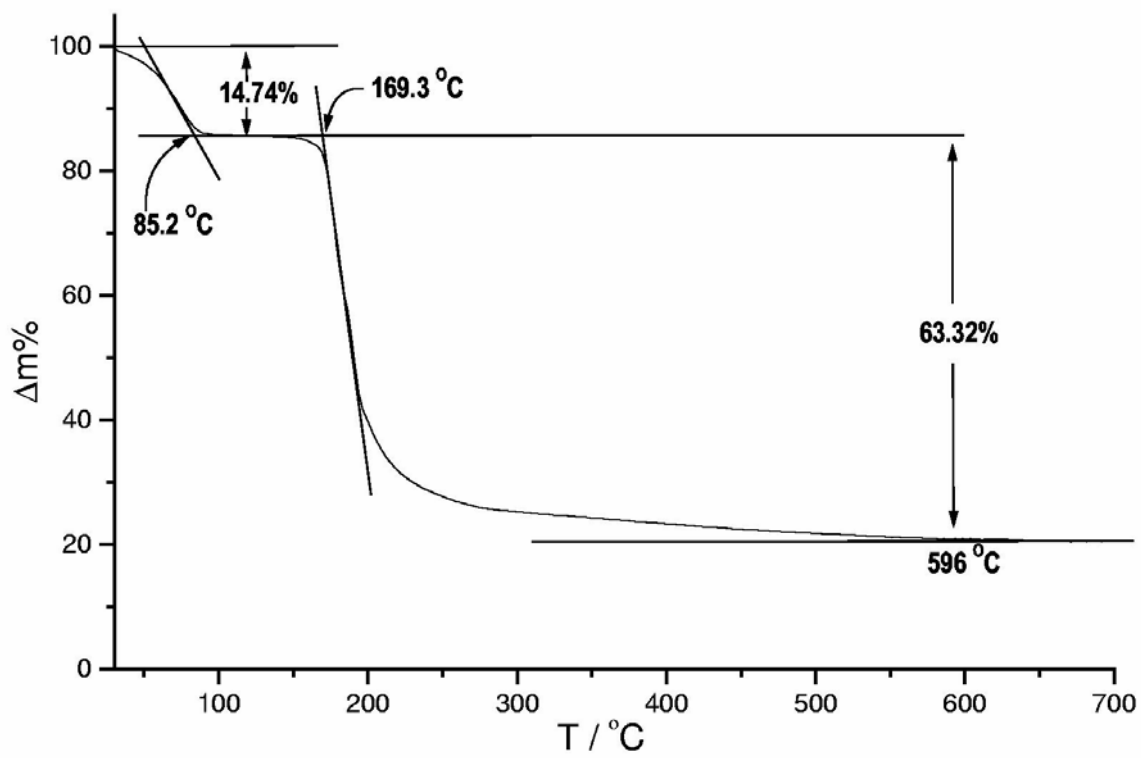

**Fig. S4** TG curve of 4.

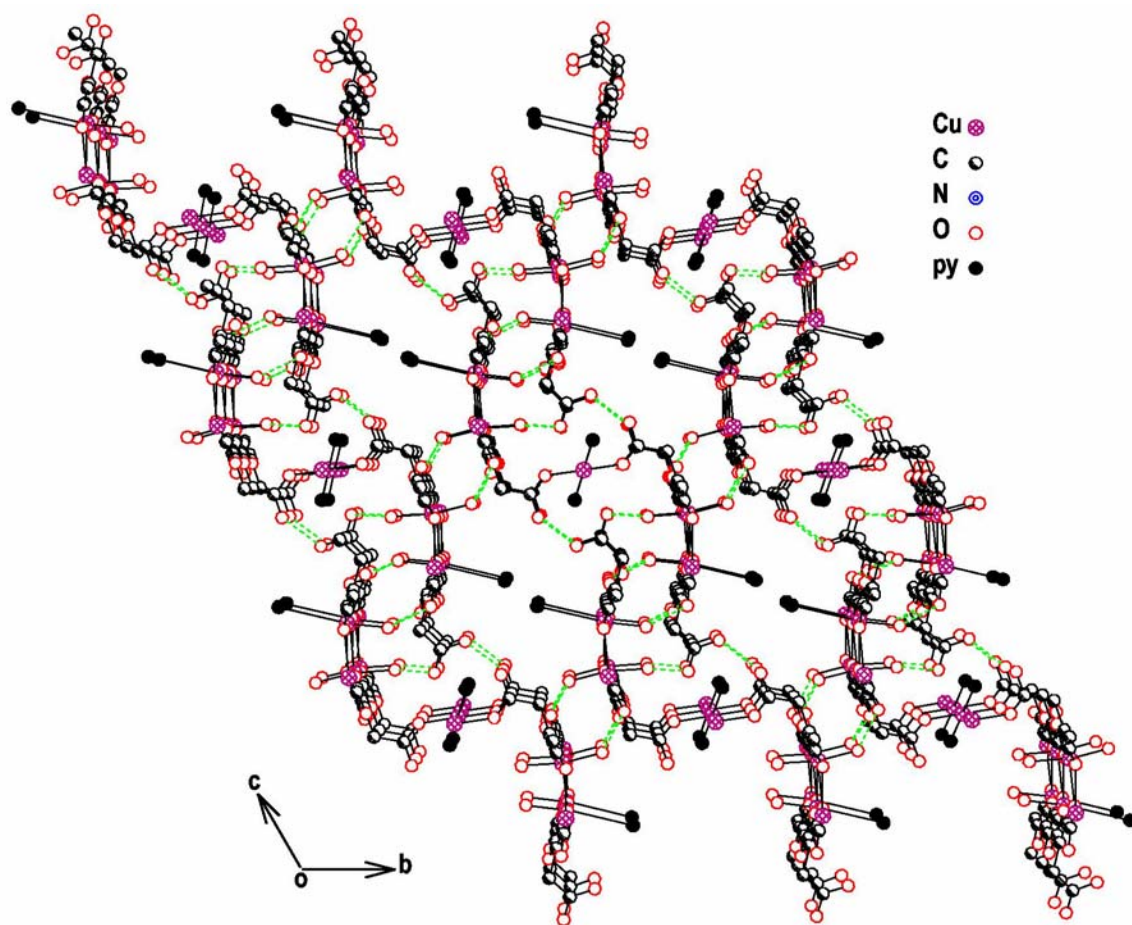

**Fig. S5** 3D packing diagram of **5** with the dash-lines showing the hydrogen bonding interactions. Hydrogen atoms are omitted for clarity.

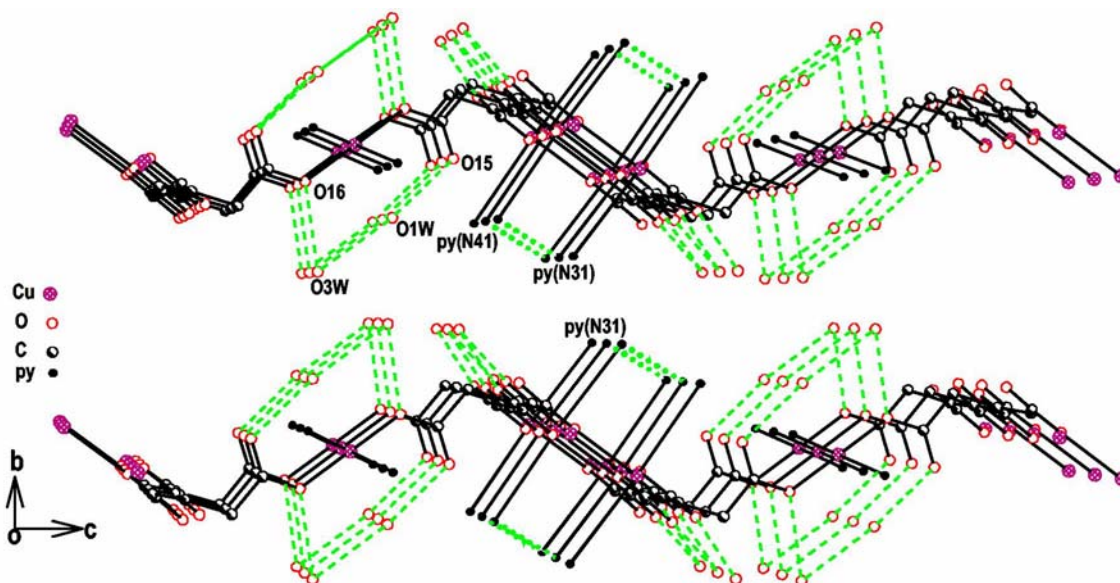

**Fig. S6** 3D packing diagram of **6** with the dash-lines showing the hydrogen bonding interactions and dotted lines depicting the  $\pi$ - $\pi$  stacking interactions (centroid to centroid distance: *ca.* 3.637 Å; dihedral angle: 11.3(2)°). For clarity hydrogen atoms are omitted and the pyridines are showed as black solid dots.
